# Supplementary material for: Old is new again: a chemical probe for targeting mitochondria and monitoring mitochondrial membrane potential in cells
Source: Royal Society of Chemistry journal article supplement (doi:10.1039/c5an00918a), 2015-01-01
Supplement: c5an00918a1.pdf [file c5an00918a1.pdf]

**Supplementary Information:**

**Old is New again: a Chemical Probe for Targeting Mitochondria and Monitoring Mitochondrial Membrane Potential in Cells**

Lu Zhang,<sup>a,d</sup> Wenwen Liu,<sup>a,d</sup> Xianhong Huang,<sup>b</sup> Guanxin Zhang,<sup>b</sup> Xuefei Wang,<sup>c</sup> Zhuo Wang,<sup>a,\*</sup> Deqing Zhang,<sup>b\*</sup> and Xingyu Jiang<sup>a,\*</sup>

<sup>a</sup> Beijing Engineering Research Center for BioNanotechnology & CAS Key Lab for Biological Effects of Nanomaterials and Nanosafety, National Center for NanoScience and Technology, Beijing 100190, China

<sup>b</sup> Beijing National Laboratory for Molecular Science, Organic Solids Laboratory, Institute of Chemistry, Chinese Academy of Science, Beijing 100190, China

<sup>c</sup> School of Chemistry and Chemical Engineering, University of Chinese Academy of Sciences, Beijing 100049, China

<sup>d</sup> These authors contributed equally.

\* To whom corresponding should be addressed. E-mail: [xingyujiang@nanoctr.cn](mailto:xingyujiang@nanoctr.cn), [wangz@nanoctr.cn](mailto:wangz@nanoctr.cn)

Contents:

**Figure S1** The low cytotoxicity of TPE-indo.

**Figure S2** Fluorescent images of TPE-indo stained Hela cells collected at different emission by confocal microscope.

**Figure S3** Amplified Fluorescent image of HeLa cells stained with TPE-indo (red) and Rhod123 (green).

**Figure S4** TPE-indo molecules target mitochondria.

**Figure S5** Washing is not required for TPE-indo staining.

**Figure S6** Emission changes of TPE-indo with the enhancement of viscosity and the concentration of BSA.

**Figure S7** Emission changes of TPE-indo with the enhancement of pH and polarity.

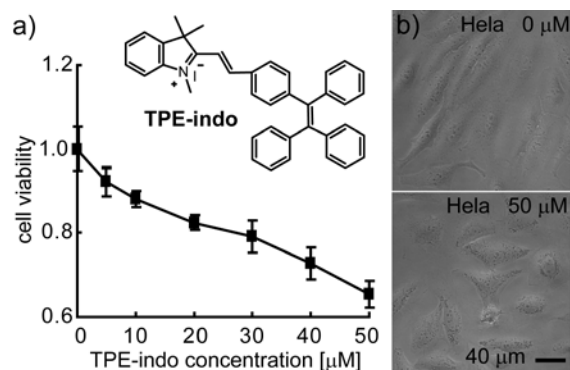

**Figure S1.** The low cytotoxicity of TPE-indo. a) Chemical structure of TPE-indo and the viability of HeLa cells after a 24-h incubation with TPE-indo. Data are represented as mean  $\pm$  s.e.m.. b) Morphology of the treated and un-treated HeLa cells by TPE-indo (50  $\mu\text{M}$ )

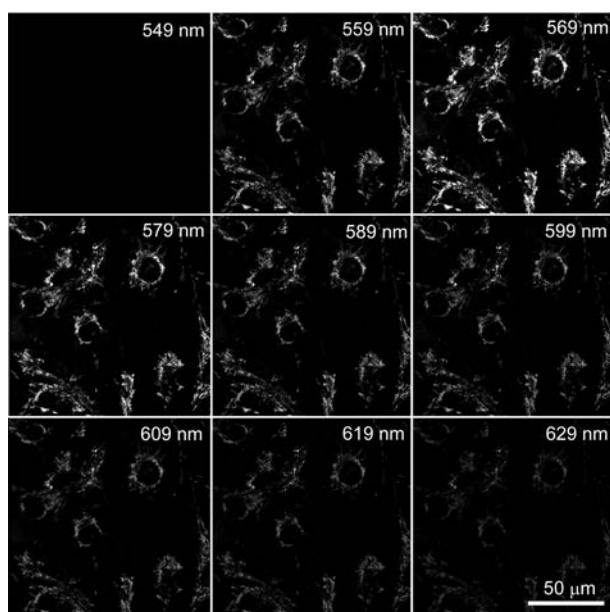

**Figure S2.** Fluorescent images of TPE-indo stained HeLa cells collected at different emission by confocal microscope. Excitation wavelength is 543 nm.

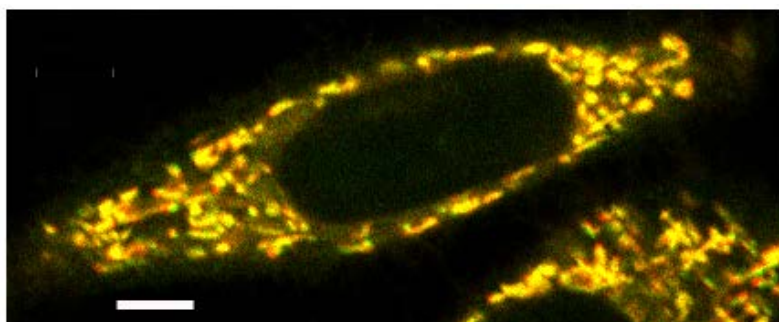

**Figure S3.** Amplified fluorescent image of HeLa cells stained with TPE-indo (red) and Rhod123 (green). Colocalization of TPE-indo and Rhod123 makes the fluorescence become yellow. Excitation wavelengths of Rhod123 and TPE-indo are 488 nm and 543 nm, respectively.

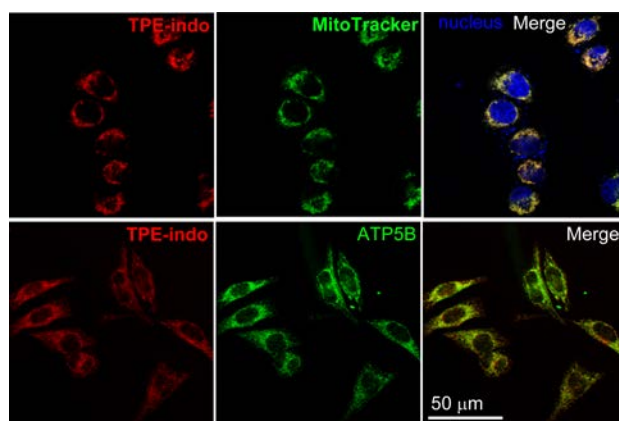

**Figure S4.** TPE-indo molecules target mitochondria. a) Fluorescent image of HeLa cells stained by TPE-indo (20  $\mu$ M, red) and MitoTracker (200 nM, green). The merged image is TPE-indo, MitoTracker, cell morphology (grey), and nucleus stained by Hoechst 33342 (blue). Colocalization of TPE-indo and MitoTracker makes the fluorescence appear yellow. b) Fluorescent image of cells stained by TPE-indo before fixation and the same cells after the immunostaining of ATP5B. Merged image shows the colocalization. Excitation wavelengths of Hoechst 33342, MitoTracker, ATP5B and TPE-indo are 405 nm, 488 nm, 488 nm, and 543 nm, respectively. The scale bar of all figures is 50  $\mu$ m.

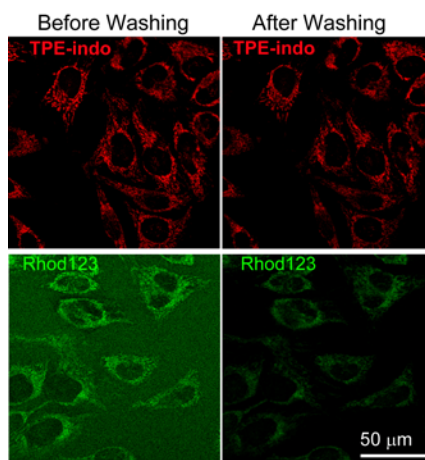

**Figure S5.** Washing is not required for TPE-indo staining. Fluorescent images of HeLa cells stained by TPE-indo and Rhod123 before and after washing.

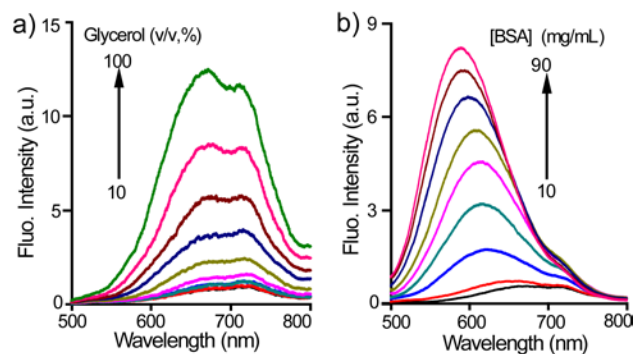

**Figure S6.** Emission changes of TPE-indo with the enhancement of viscosity and the concentration of BSA. a) Variation of the fluorescence spectra of TPE- indo upon enhancement of solution viscosity; b) Variation of the fluorescence spectra of TPE-indo in the presence of different amounts of BSA.

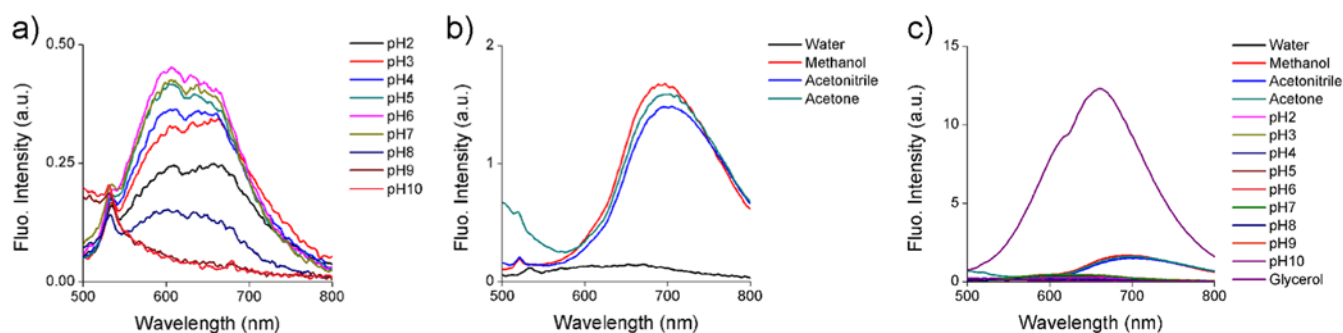

**Figure S7.** Emission changes of TPE-indo with the enhancement of pH and polarity. a) Variation of the fluorescence spectra of TPE-indo upon enhancement of solution pH; b) Variation of the fluorescence spectra of TPE-indo upon enhancement of solution polarity; c) Comparison of the fluorescence spectra between the solvents with various pH, polarity, viscosity and the concentration of BSA.
